1 **Role of Inflammasome-independent Activation of IL-1 $\beta$  by the *Pseudomonas***  
2 ***aeruginosa* Protease LasB**

3

4 Running title: LasB Activation of IL-1 $\beta$

5

6 Josh Sun<sup>a</sup>, Doris L. LaRock<sup>c</sup>, Elaine A. Skowronski<sup>a</sup>, Jacqueline M. Kimmey<sup>b,1</sup>, Joshua Olson<sup>b</sup>,  
7 Zhenze Jiang<sup>a</sup>, Anthony J. O'Donoghue<sup>a</sup>, Victor Nizet<sup>a,b</sup>, Christopher N. LaRock<sup>c,d,e,#</sup>

8

9 <sup>a</sup>Skaggs School of Pharmacy and Pharmaceutical Sciences, UC San Diego, La Jolla, CA, USA

10 <sup>b</sup>Department of Pediatrics, UC San Diego, La Jolla, CA, USA

11 <sup>c</sup>Department of Microbiology and Immunology, Emory School of Medicine, Atlanta GA, USA

12 <sup>d</sup>Division of Infectious Diseases, Emory School of Medicine, Atlanta GA, USA

13 <sup>e</sup>Antimicrobial Resistance Center, Emory University, Atlanta GA, USA

14

15 <sup>#</sup>Address correspondence to Christopher LaRock, [christopher.larock@emory.edu](mailto:christopher.larock@emory.edu)

16 <sup>1</sup>Present address: Jacqueline Kimmey, Department of Microbiology and Environmental  
17 Toxicology, UC Santa Cruz, Santa Cruz, CA, USA

18

19 All authors declare no conflicts of interest

20

21

22 **Abstract**

23 Pulmonary damage by *Pseudomonas aeruginosa* during cystic fibrosis lung infection and  
24 ventilator-associated pneumonia is mediated both by pathogen virulence factors and host  
25 inflammation. Impaired immune function due to tissue damage and inflammation, coupled with  
26 pathogen multidrug resistance, complicates management of these deep-seated infections.  
27 Therefore, preservation of lung function and effective immune clearance may be enhanced by  
28 selectively controlling inflammation. Pathological inflammation during *P. aeruginosa* pneumonia  
29 is driven by interleukin-1 $\beta$  (IL-1 $\beta$ ). This proinflammatory cytokine is canonically regulated by  
30 caspase-family inflammasome proteases, but we report that plasticity in IL-1 $\beta$  proteolytic  
31 activation allows for its direct maturation by the pseudomonal protease LasB. LasB promotes IL-  
32 1 $\beta$  activation, neutrophilic inflammation, and destruction of lung architecture characteristic of  
33 severe *P. aeruginosa* pulmonary infection. Discovery of this IL-1 $\beta$  regulatory mechanism provides  
34 a distinct target for anti-inflammatory therapeutics, such that matrix metalloprotease inhibitors  
35 blocking LasB limit inflammation and pathology during *P. aeruginosa* pulmonary infections.

36 **Keywords:** *Pseudomonas aeruginosa*; proteolysis; inflammation; lung;

37  
38 **Highlights:**

- 39 •IL-1 $\beta$  drives pathology during pulmonary infection by *Pseudomonas aeruginosa*.
- 40 •The *Pseudomonas* protease LasB cleaves and activates IL-1 $\beta$  independent of canonical and
- 41 noncanonical inflammasomes
- 42 •Metalloprotease inhibitors active against LasB limit inflammation and bacterial growth

43  
44 **Research in Context:** Inflammation is highly damaging during lung infections by the  
45 opportunistic pathogen *Pseudomonas aeruginosa*. Sun et al. demonstrate that the *Pseudomonas*  
46 LasB protease directly activates IL-1 $\beta$  in an inflammasome-independent manner. Inhibition of IL-  
47 1 $\beta$  conversion by LasB protects against neutrophilic inflammation and destruction of the lung.  
48 Adjunctive therapeutics that limit pathological inflammation induced by infection would be  
49 beneficial for the treatment of pulmonary infections when used with conventional antibiotics.

## 50 **Introduction**

51 *Pseudomonas aeruginosa* is a prominent cause of severe opportunistic pulmonary infections  
52 associated with mechanical ventilation and the genetic disease cystic fibrosis (CF). *P. aeruginosa*  
53 infection is often refractory to antibiotic therapy due to multidrug resistance, making it a World  
54 Health Organization and U.S. Centers for Disease Control priority pathogen for therapeutic  
55 development. *P. aeruginosa* infection destroys lung architecture and function due to inflammatory-  
56 and neutrophil-mediated degradation of mucin layers and structural proteins of the pulmonary  
57 connective tissue<sup>1,2</sup>. Neutrophil cytokines such as IL-1 $\beta$ <sup>3,4</sup> and IL-8<sup>5</sup>, the latter itself regulated  
58 by IL-1 $\beta$ <sup>6</sup>, initiate and maintain this inflammatory cycle. Anti-inflammatory agents can mitigate  
59 tissue destruction to preserve pulmonary function during *P. aeruginosa* pneumonia<sup>7</sup> and CF<sup>8,9</sup>.

60  
61 Newly synthesized IL-1 $\beta$  (pro-IL-1 $\beta$ ) is inactive and requires proteolytic processing into a mature  
62 active form. Canonically, this is carried out by the inflammasome, a macromolecular complex of  
63 intracellular pattern recognition receptors and the proteases caspase-1 or caspase-11<sup>10</sup>. During  
64 infection, inflammasomes are formed upon detection of pathogen-associated molecular patterns  
65 (PAMPs), including many present in *P. aeruginosa* such as flagellin (FliC), the type III secretion  
66 basal body rod (PscI), the type IV pilin (PilA), RhsT, exolysin (ExlA), exotoxin A (ExoA), cyclic  
67 3'-5' diguanylate (c-di-GMP), and lipopolysaccharide (LPS), which are varyingly detected by  
68 NLRC4, NLRP3, or caspase-11<sup>11-19</sup>. Some pathogens limit inflammation by targeting the  
69 inflammasome<sup>20</sup>, and *P. aeruginosa* dampens inflammasome activation via the effector ExoU<sup>18</sup>.  
70 Despite the multitude of inflammasome-activating signals that *P. aeruginosa* express, caspases,  
71 NLRP3, and NLRC4 are not essential for pro-IL-1 $\beta$  maturation in macrophages, epithelial cells,  
72 or neutrophils infected with *P. aeruginosa*<sup>21,22</sup>. Correspondingly, *P. aeruginosa*-infected caspase-  
73 1<sup>-/-</sup> and caspase-1/11<sup>-/-</sup> mice succumb to a destructive neutrophilic pulmonary inflammation against

74 which IL-1 receptor (IL-1R1<sup>-/-</sup>) mice are protected<sup>23</sup>. These observations highlight the contribution  
75 of IL-1 $\beta$  to *P. aeruginosa* infection but suggest there are mechanisms for its maturation other than  
76 the inflammasome.

77  
78 The pathological cascade of protease dysregulation and activation seen during severe *P.*  
79 *aeruginosa* lung infections provide a possibility for IL-1 $\beta$  maturation by alternative mechanisms.  
80 Caspase-8<sup>24-26</sup>, and the neutrophil granular proteases elastase (NE) and proteinase 3 (PR3)<sup>3,4,27</sup>,  
81 cleave pro-IL-1 $\beta$ , but this does not always result in active cytokine<sup>28</sup>. Bronchial secretions,  
82 however, also possess abundant protease activity from microbial sources<sup>2</sup>. Here we find that IL-  
83 1 $\beta$  is not exclusively matured by host proteases, and that *P. aeruginosa* protease LasB also drives  
84 this inflammatory pathway. Targeting this bacterial protease may, therefore, provide supportive  
85 therapy to limit inflammatory pathology in pulmonary infection.

## 86 87 **Results**

### 88 **IL-1 $\beta$ drives neutrophilic inflammation during *P. aeruginosa* lung infection**

89 Inflammation drives poor clinical outcomes during *P. aeruginosa* lung infection<sup>29</sup>. C57Bl/6 mice  
90 infected intratracheally with *P. aeruginosa* had markedly disrupted airway architecture within 24  
91 h, concurrent with neutrophil infiltration into the lung tissue and bronchoalveolar lavage fluid  
92 (BAL) (Figure 1A). We examined the contribution of pro-inflammatory cytokines to this process  
93 using the FDA-approved IL-1 receptor (IL-1R1) antagonist anakinra, which directly inhibits both  
94 IL-1 $\beta$  and IL-1 $\alpha$ , but not other critical proinflammatory cytokines such as KC/CXCL1, IL-6, or  
95 TNF $\alpha$  (Figure 1B). As observed during human infections, *P. aeruginosa* persisted in the BAL  
96 (Figure 1C) and lung tissue (Figure 1D) despite significant neutrophil infiltration that was partially  
97 IL-1-dependent (Figure 1E).



98  
99 IL-1 $\beta$  is typically released by secretion or cell lysis and requires additional maturation, activities  
100 which are all mediated by the inflammasome proteases caspases -1 or -11<sup>10</sup>. CFU and release of  
101 IL-1 $\alpha$  was unaltered in *P. aeruginosa*-infected caspase-1/11<sup>-/-</sup> C57Bl/6 mice, but surprisingly, IL-  
102 1 $\beta$  release was also only modestly attenuated (Figure 1F). This pool of extracellular IL-1 $\beta$  has the  
103 potential to mediate proinflammatory signaling as an IL-1R1 agonist when the inhibitory pro-  
104 domain has been removed. Neutrophil granular proteases may provide such activation<sup>3,4,15,21</sup>,  
105 however, since neutrophil recruitment is itself IL-1 $\beta$ -dependent (Figure 1A, 1E), and these  
106 neutrophils themselves may later inactivate IL-1 $\beta$ <sup>28</sup>, we reasoned that additional proteases initiate  
107 the process.

108

### 109 ***P. aeruginosa* induces IL-1 $\beta$ maturation independent of the inflammasome**

110 To more specifically measure only IL-1 $\beta$  that is active, we made use of transgenic reporter cells  
111 expressing luciferase under the control of the IL-1R (Figure 2A) similar to previously<sup>30</sup>.  
112 Consistent with our *in vivo* observations, caspase-1/11<sup>-/-</sup> bone-marrow-derived macrophages  
113 (BMM) still released cytokines that activated IL-1R1 reporter cells upon infection with *P.*  
114 *aeruginosa* PAO1 (Figure 2B). This activity was conserved across numerous *P. aeruginosa*  
115 isolates. In contrast, an ionophore that activates the NLRP3 inflammasome, nigericin, was  
116 completely dependent on caspases for the activation of IL-1 signaling. Furthermore, *P. aeruginosa*  
117 infection of human cell lines relevant to lung infection (macrophages, THP-1; neutrophils, HL60;  
118 type II alveolar epithelial cells, A549) still stimulated IL-1 signaling in the presence of the caspase-  
119 1/11-specific inhibitor YVAD-cmk (Figure 2C). Monoclonal antibodies specific to IL-1R1 or IL-  
120 1 $\beta$ , but not IL-1 $\alpha$ , inhibited IL-1 signal from caspase-1/11<sup>-/-</sup> BMM (Figure 2D). The absolute

121 quantity of each cytokine measured by enzyme-linked immunosorbent assay (pro- and mature-  
122 forms) remained unchanged (Figure 2D). Together, these results indicate that *P. aeruginosa*  
123 stimulates IL-1 signaling through a pool of extracellular IL-1 $\beta$  that is active and matured  
124 independently of caspase-1/11.

125

### 126 **IL-1 $\beta$ is activated by the *P. aeruginosa* LasB protease**

127 Proteases contributing to IL-1 $\beta$  activation were evaluated using small molecule inhibitors specific  
128 to each protease class. Inhibition of metalloproteases, and not cysteine proteases (e.g. caspases-1,  
129 11, and 8) or serine proteases (e.g. NE and PR3), abrogated IL-1 $\beta$  signaling in *P. aeruginosa*-  
130 infected caspase-1/11<sup>-/-</sup> BMM (Figure 3A). *P. aeruginosa* encodes several secreted  
131 metalloproteases, and by examining mutants of each ( $\Delta lasA$ ,  $\Delta lasB$ ,  $\Delta aprA$ ), we found LasB to be  
132 the most active protease overall as measured by hydrolysis of casein during agar plate growth  
133 (Figure 3B), and was the major contributor to caspase-1/11-independent IL-1 $\beta$  signaling (Figure  
134 3C). Complementation with the LasB coding sequence under its native promoter restored the  
135 ability of  $\Delta lasB$  *P. aeruginosa* to induce IL-1 $\beta$  signaling in infected caspase-1/11<sup>-/-</sup> BMM (Figure  
136 3D). Furthermore, activation was independent of *illb* expression (Figure 2E). These data show  
137 that LasB induces IL-1 signaling independently of caspase-1/11.

138

### 139 **LasB-activated IL-1 $\beta$ is active**

140 Incubation with recombinant LasB was sufficient to convert recombinant human pro-IL-1 $\beta$  into  
141 an active form (Figure 4A). Further examination of pro-IL-1 $\beta$  cleavage by LasB, again using  
142 recombinant forms of each protein, showed several intermediate cleavage products which  
143 accumulate as a stable product that is degraded no further (Figure 4B), similar to what occurs upon

144 IL-1 $\beta$  maturation by caspase-1<sup>31</sup>. Analysis of these fragments by Edman sequencing identified  
145 cleavage sites that were all in the N-terminus of pro-IL-1 $\beta$ . Examination of N-terminal truncated  
146 IL-1 $\beta$  by *in vitro* transcription/translation showed a defined region flanking the caspase-1 cleavage  
147 site (N-term fragment 117) is sufficient to generate active cytokine (Figure 4C). We further  
148 examined proteolysis in this ~ 20 amino acid region with a series of internally quenched  
149 fluorescent peptides and found that LasB preferentially cleaved within the sequence  
150 HDAPVRS LN of pro-IL-1 $\beta$  (Figure 4D). Mass spectroscopy confirmed that LasB cleaved  
151 between Ser-121 and Leu-122 (Figure 4D, Figure S1), at a site conserved between mice and  
152 humans that matches the smallest IL-1 $\beta$  form we observed during SDS-PAGE (Figure 4B). This  
153 site also matches the substrate specificity profile for LasB (Figure 4E), which shows a distinct  
154 preference for cleaving peptide bonds when Ser or Thr are in the P1 position (amino-terminal side  
155 of bond) and hydrophobic amino acids such as Phe, Leu, Nle, Tyr, Trp and Ile in the P1' position  
156 (Supplementary Spreadsheets 1-3), generated using a mass spectrometry-based substrate profiling  
157 assay previously validated with other microbial proteases<sup>32,33</sup>. During infection, the signature of  
158 IL-1 $\beta$ -targeted proteolysis (Figure 4F) is consistent with a significant role for LasB-mediated  
159 maturation (hydrolysis of HDAPVRS LN) compared to caspase-1 (hydrolysis of EAYVHDAPV)  
160<sup>30</sup>. These data support the model that the pro-domain of IL-1 $\beta$  is promiscuous to protease activation  
161 and that the location of specific cleavages can dictate subsequent signaling activity.

162

### 163 **Metalloprotease inhibitors of LasB prevent IL-1 $\beta$ -mediated pathological inflammation**

164 Since IL-1 $\beta$  inhibition protects against lung damage (Figure 1A, 1B), and because LasB drives IL-  
165 1 $\beta$  maturation (Figure 3C, 4D), we examined whether protease inhibitors active against LasB limit  
166 lung injury. Two investigational hydroxamate-based anti-neoplastic metalloprotease inhibitors,

167 marimastat and ilomastat, inhibited LasB cleavage of the IL-1 $\beta$ -derived substrate (Figure 5A) and  
168 *P. aeruginosa* activation of IL-1 $\beta$  (Figure 5B) at sub-antimicrobial concentrations (Figure S2A).  
169 During murine pulmonary infection, marimastat and ilomastat each showed therapeutic effects to  
170 reduce IL-1 $\beta$  (Figure 5C), neutrophil recruitment (Figure 5D), pulmonary pathology (Figure 5E),  
171 and invasion (Figure S2B). Together this data suggests that inhibiting metalloproteases, including  
172 LasB, can reduce inflammation during infections by *P. aeruginosa*.

## 173 174 **Discussion**

175 Opportunistic *P. aeruginosa* lung infections can destroy tissue structure and impair organ function.  
176 Our findings reveal a mechanism by which a bacterial protease, LasB, contributes to pathological  
177 inflammation by directly activating IL-1 $\beta$ . LasB is one of the most abundant virulence factors in  
178 the lung microenvironment during *P. aeruginosa* infection and can cleave numerous host factors  
179 <sup>34</sup>, even exerting broadly anti-inflammatory influences through destructive proteolysis of PAMPs  
180 such as flagellin <sup>35</sup>, and various cytokines including IFN, IL-6, IL-8, MCP-1, TNF, trappin-2 and  
181 RANTES <sup>36-39</sup>. Consequently, LasB-deficient bacteria may preferentially induce a KC, IL-6, and  
182 IL-8 dominant inflammatory response <sup>36</sup>, whereas we find wild-type *P. aeruginosa* induce a strong  
183 IL-1 $\beta$  response.

184 LasB activates IL-1 $\beta$  through direct proteolytic removal of its inhibitory amino-terminal pro-  
185 domain, bypassing the necessity for host caspases. The LasB and caspase-1 mechanisms for  
186 generating mature IL-1 $\beta$  are distinguishable by substrate specificity (a hydrophobic P1' vs aspartic  
187 acid P1 site), enzyme class (metalloprotease vs cysteine protease), and cellular source (microbial  
188 vs host). LasB activation of pro-IL-1 $\beta$  in both the intra- and extracellular milieu is entirely feasible,  
189 given the abundance of intracellular proteins released by pyroptosis and necrosis during infections

190 <sup>10,40</sup> and the abundance of LasB <sup>41</sup>. We recently hypothesized that IL-1 $\beta$  evolved as a sensor of  
191 diverse proteases <sup>30</sup>, a model further supported by the present discovery of a *P. aeruginosa* protease  
192 with this activity.

193 In lung infection, LasB activation of IL-1 $\beta$  augments neutrophil recruitment and promotes  
194 destruction of the pulmonary tissue. IL-1 $\beta$  inhibition protects against this pathology, however,  
195 clinical interventions to date have utilized expensive biologics (e.g. IL-1R1 antagonists) associated  
196 with increased risk for severe infections <sup>30,42</sup>. The proteolytic activation of IL-1 $\beta$  may be a more  
197 tractable pharmacological target, made possible by disambiguation of the molecular networks  
198 involved and, perhaps amenable to the repurposing existing proteases inhibitors. Alpha-1-  
199 antitrypsin suppresses NE-mediated degradation of the CF lung <sup>43,44</sup>, potentially also limiting pro-  
200 IL-1 $\beta$  maturation by NE <sup>27</sup>. This strategy may also act against pro-IL-1 $\beta$  maturation by LasB,  
201 which is also inhibited by alpha-1-antitrypsin <sup>45</sup>. Metalloprotease inhibitors such as marimastat  
202 and ilomastat may also be beneficial in treating CF <sup>46</sup> not only for inhibiting matrix  
203 metalloproteases, but also by cross-inhibiting LasB (Figure 5).

## 204 MATERIALS AND METHODS

205 **Bacterial strains and plasmids.** All bacterial strains, plasmids, and primers used in this study are  
206 listed in Table 1. *lasB* and the upstream 260 bp regulatory region in PAO1 were cloned into  
207 pUC18T-mini-Tn7T-*hph* <sup>47</sup> using Polymerase Incomplete Primer Extension (PIPE) cloning <sup>48</sup> with  
208 primers lasB-F, lasB-R, Tn7-F, and Tn7-R. Transformants into Top10 cells were selected on LB  
209 agar plates containing 100  $\mu$ g/mL Hygromycin B (Life Technologies). Stable complementation  
210 into PAO1  $\Delta$ *lasB* was performed as previously described <sup>47</sup>, and transformants selected with 400  
211  $\mu$ g/mL Hygromycin B. pET-LasB with a C-terminal His tag was constructed by sequential PIPE

212 cloning with the primers LasB-A, LasB-B, LasB-C, and LasB-D, and proteins were expressed and  
213 purified by conventional methods as previously described<sup>30</sup>. pET-pro-IL-1 $\beta$  and the purification  
214 of pro-IL-1 $\beta$  have been previously described<sup>30</sup>. Constructs for the expression of IL-1 $\beta$  mutants  
215 were generated by PIPE cloning from pET-pro-IL-1 $\beta$ <sup>30</sup> with the corresponding primers sets in  
216 Table 1, and proteins were expressed and purified in the same manner as for pro-IL-1 $\beta$  previously  
217<sup>30</sup>. Bacteria were routinely propagated in Luria broth (LB) medium at 37 °C. For infections,  
218 bacterial cultures were grown to late exponential phase (OD<sub>600</sub> 1.2) then washed and diluted in  
219 PBS.

220 **Animal Experiments.** The UCSD or Emory University Institutional Animal Care and Use  
221 Committees approved all animal use. Eight-to-ten week old male or female C57Bl/6 and isogenic  
222 caspase-1/-11<sup>-/-</sup> mice were anesthetized with ketamine/xylazine intraperitoneally, then 10<sup>7</sup> CFU  
223 PAO1 inoculated intratracheally in 30  $\mu$ l of 1x PBS, 25  $\mu$ g/kg Ilomastat, and 25  $\mu$ g/kg Marimastat.  
224 Mice were euthanized by CO<sub>2</sub> asphyxiation, and bronchiolar lavage fluid or lung homogenate were  
225 dilution plated onto LB agar plates for CFU enumeration, or quantification of cytokines or  
226 proteolysis. Bronchiolar lavage fluid cells were counted on a hemocytometer with cytologic  
227 examination on cytospin preparations fixed and stained using Hema 3 (Fisher HealthCare™).  
228 Histologic sections were prepared from formalin-fixed and paraffin-embedded lungs, stained with  
229 hematoxylin and eosin (H&E). Cytospin and histology slides were imaged on a Hamamatsu  
230 Nanozoomer 2.0Ht Slide Scanner.

231 ***In vitro* infection models.** Macrophages were generated from femur exudates of wild-type  
232 C57Bl/6 (Jackson Laboratories) or caspase-1/11<sup>-/-</sup> (kindly provided by R. Flavell) mice using M-  
233 CSF containing L929 cell supernatants as previously<sup>30</sup>. THP-1, HL60, and A549 cells were  
234 propagated by standard protocols detailed previously<sup>49</sup>. One hour before infection, the media was

235 replaced with RPMI lacking phenol red, fetal bovine serum, and antibiotics. Inhibitor treatments  
236 were added 1 h before infection and include: 20 µg/mL Anakinra (Amgen), 100 ng/mL rIL-1β  
237 (R&D Systems), 5 µM caspase inhibitors zVAD-fmk, YVAD-fmk, DEVD-fmk, and IETD-fmk  
238 (R&D Systems), 10 µg/mL complete protease inhibitor cocktail (Roche), 1x protease inhibitors  
239 AEBSF, Antipain, Aprotinin, Bestatin, EDTA, E-64, Phosphoramidon, Pepstatin, and PMSF (G-  
240 Biosciences). Except when noted, cells were routinely infected by co-incubation with *P.*  
241 *aeruginosa* at a multiplicity of infection of 10, spun into contact for 3 min at 300 g, and cells or  
242 supernatants were harvested for analysis after 2 h.

243 **Cytokine measurements.** Relative IL-1 signaling by cells was measured in 50 µl of supernatant  
244 from infected or treated cells, then incubated with 1 µM okadaic acid 30 min before transfer onto  
245 transgenic IL-1R reporter cells (Invivogen). After 18 h, reporter cell supernatants were analyzed  
246 for secreted alkaline phosphatase activity using HEK-Blue Detection reagent (Invivogen).  
247 Cytokines were quantified by enzyme-linked immunosorbent assay following the manufacturer's  
248 protocol (R&D Systems). Expression was examined in cells lysed with RIPA (Millipore). RNA  
249 was isolated (Qiagen), cDNA synthesized with SuperScript III and Oligo(dT)20 primers  
250 (Invitrogen), and qPCR performed with KAPA SYBR Fast (Kapa Biosystems) with primers for  
251 *il1b* and relative expression normalized to *gapdh* and compared by  $\Delta\Delta C_t$  as previously<sup>50</sup>. *In vitro*  
252 transcription/translation was performed with the corresponding primers in **Table 1** using pET-pro-  
253 IL-1β as a template and following the manufacturer's recommendations in 10 µl reaction volumes  
254 (TNT Coupled Reticulocyte Lysate; Promega). Loading for IL-1R reporter assays was normalized  
255 by total IL-1β product measured by enzyme-linked immunosorbent assay (R&D Systems).

256 **Substrate specificity profiling.** 10 nM LasB was incubated in triplicate with a mixture of 228  
257 synthetic tetradecapeptides (0.5 µM each) in PBS, 2mM DTT as described previously<sup>51</sup>. After 15,

258 60, 240 and 1200 min, aliquots were removed, quenched with 6.4 M GuHCl, immediately frozen  
259 at -80°C. Controls were performed with LasB treated with GuHCl prior to peptide exposure.  
260 Samples were acidified to pH<3.0 with 1% formic acid, desalted with C18 LTS tips (Rainin), and  
261 injected into a Q-Exactive Mass Spectrometer (Thermo) equipped with an Ultimate 3000 HPLC.  
262 Peptides separated by reverse phase chromatography on a C18 column (1.7 µm bead size, 75 µm  
263 x 20 cm, 65°C) at a flow rate of 400 nl/min using a linear gradient from 5% to 30% B, with solvent  
264 A: 0.1% formic acid in water and solvent B: 0.1% formic acid in acetonitrile. Survey scans were  
265 recorded over a 150–2000 m/z range (70000 resolutions at 200 m/z, AGC target  $1 \times 10^6$ , 75 ms  
266 maximum). MS/MS was performed in data-dependent acquisition mode with HCD fragmentation  
267 (30 normalized collision energy) on the 10 most intense precursor ions (17500 resolutions at 200  
268 m/z, AGC target  $5 \times 10^4$ , 120 ms maximum, dynamic exclusion 15 s).  
269 Peak integration and data analysis were performed using Peaks software (Bioinformatics Solutions  
270 Inc.). MS<sup>2</sup> data were searched against the tetradecapeptide library sequences and a decoy search  
271 was conducted with sequences in reverse order with no protease digestion specified. Data were  
272 filtered to 1% peptide and protein level false discovery rates with the target-decoy strategy.  
273 Peptides were quantified with label free quantification and data normalized by LOWESS and  
274 filtered by 0.3 peptide quality. Missing and zero values are imputed with random normally  
275 distributed numbers in the range of the average of smallest 5% of the data±SD. Enzymatic progress  
276 curves of each unique peptide were obtained by performing nonlinear least-squares regression on  
277 their peak areas in the MS precursor scans using the first-order enzymatic kinetics model:  $Y =$   
278  $(\text{plateau} - Y_0) \times (1 - \exp(-t \times k_{\text{cat}} / K_M \times [E_0])) + Y_0$ , where  $E_0$  is the total enzyme concentration. Nonlinear  
279 regression was performed on cleavage products only if the following criteria were met: Peptides  
280 were detected in at least 2 of the 3 replicates and the peak intensity of peptides increased by



281 >50,000 and >5-fold over the course of the assay. Proteolytic efficiency was solved from the  
282 progress curves by estimating total enzyme concentration and is reported as  $k_{cat}/K_M$  and clustered  
283 into 8 groups by Jenks optimization method. IceLogo software was used for visualization of  
284 amino-acid frequency using cleavage sequences in the top 3 clusters (118 most efficiently cleaved  
285 peptides). Mass spectrometry deposited: <ftp://massive.ucsd.edu/MSV000081623>.

286 **Protease Measurements.** Internally-quenched peptides 7-Methoxycoumarin- (Mca) labeled on  
287 the amino terminus and 2, 4-dinitrophenyl (Dnp) on the carboxy terminus were synthesized with  
288 the sequences of IFFDTWDNE, TWDNEAYVH, EAYVHDAPV, and HDAPVRSLN,  
289 corresponding to amino acids 103-111, 107-115, 111-119, and 115-123 of the reference human  
290 pro-IL-1 $\beta$  sequence (UniProt: P01584; CPC Scientific). In triplicate, 10  $\mu$ M peptides were  
291 incubated in PBS, 1 mM CaCl<sub>2</sub>, 0.01% Tween-20, with 5 nM human caspase-1 (Enzo) or LasB  
292 (Elastin Products Co.). The reaction was continuously monitored using an EnSpire plate reader  
293 (PerkinElmer) with 323nm fluorophore excitation and 398nm emission and the maximum kinetic  
294 velocity calculated as previously<sup>30</sup>. The cleavage site was determined by incubating 10 nM of  
295 LasB with 10  $\mu$ M of HDAPVRSLN. At 20, 40 and 60 min intervals each reaction was quenched  
296 with 6.4 M GuHCl and the cleavage products desalted and analyzed by mass spectrometry as  
297 described above, except using a 20-min linear gradient from 5% to 50% B and only selecting top  
298 5 peptides for MS/MS.

299 **Statistical analysis.** Statistical significance was calculated by unpaired Student t test (\*,  $P < 0.05$ ;  
300 \*\*,  $P < 0.005$ ) using GraphPad Prism unless otherwise indicated. Data are representative of at least  
301 three independent experiments. For iceLogo plots only amino acids with significantly ( $P < 0.05$ )  
302 increased or decreased frequency are shown.

303  
304 **Acknowledgments**

305 We thank Christopher Lietz (UCSD) for assistance with mass spectrometry and data analysis, the  
306 UCSD Histopathology Core facility, the UCSD Neuroscience Microscopy Shared Facility (P30  
307 NS047101), Jason Munguia (UCSD) for technical assistance, Colin Manoil (UW) for  
308 *Pseudomonas* transposon mutants (P30 DK089507) and Joanna Goldberg (Emory) for helpful  
309 advice and discussions. J.S. received support from NIH/NIGMS T32 GM007752, E.A.S. from  
310 NIH/NCI T32 CA121938, J.M.K. from a UC President's Postdoctoral Fellowship, Z.J. from the  
311 UC San Diego Chancellor's Research Excellence Scholarship, A.J.O. from NIH/NIBIB  
312 AI1333393, V.N. from NIH/NICHD grant U54 HD090259 and NIH/NHLBI R01 HL125352, and  
313 C.L. the A.P. Giannini Foundation and NIH/NIAID K22 AI130223. C.N.L. has a research  
314 agreement with Antabio examining inhibitors of LasB. The content is solely the responsibility of  
315 the authors and does not necessarily represent the official views of the National Institutes of Health.

#### 316 **Author contributions**

317 J.S., A.J.O., V.N., and C.N.L. designed experiments and interpreted the data. J.S., D.L., J.K., J.O.,  
318 Z.J., E.A.S., A.J.O., and C.N.L. conducted the studies. J.S., V.N., and C.N.L. wrote the manuscript  
319 with the assistance of all of the authors.

320

321

## 322 References

- 323 1. Suter S, Schaad UB, Roux L, Nydegger UE, Waldvogel FA. Granulocyte neutral  
324 proteases and Pseudomonas elastase as possible causes of airway damage in patients with cystic  
325 fibrosis. *Journal of Infectious Diseases* 1984; **149**(4): 523-31.
- 326 2. Twigg MS, Brockbank S, Lowry P, FitzGerald SP, Taggart C, Weldon S. The role of  
327 serine proteases and antiproteases in the cystic fibrosis lung. *Mediators of inflammation* 2015;  
328 **2015**: 293053.
- 329 3. Coeshott C, Ohnemus C, Pilyavskaya A, et al. Converting enzyme-independent release of  
330 tumor necrosis factor  $\alpha$  and IL-1 $\beta$  from a stimulated human monocytic cell line in the presence  
331 of activated neutrophils or purified proteinase 3. *Proceedings of the National Academy of*  
332 *Sciences of the United States of America* 1999; **96**: 6261-6.
- 333 4. Greten FR, Arkan MC, Bollrath J, et al. NF- $\kappa$ B is a negative regulator of IL-1 $\beta$  secretion  
334 as revealed by genetic and pharmacological inhibition of IKK $\beta$ . *Cell* 2007; **130**(5): 918-31.
- 335 5. Nakamura H, Yoshimura K, McElvaney NG, Crystal RG. Neutrophil elastase in  
336 respiratory epithelial lining fluid of individuals with cystic fibrosis induces interleukin-8 gene  
337 expression in a human bronchial epithelial cell line. *Journal of Clinical Investigation* 1992;  
338 **89**(5): 1478.
- 339 6. Labrousse D, Perret M, Hayez D, et al. Kineret®/IL-1ra Blocks the IL-1/IL-8  
340 Inflammatory Cascade during Recombinant Panton Valentine Leukocidin-Triggered Pneumonia  
341 but Not during S. aureus Infection. *PloS one* 2014; **9**(6): e97546.
- 342 7. Schultz MJ, Rijneveld AW, Florquin S, Edwards CK, Dinarello CA, van der Poll T. Role  
343 of interleukin-1 in the pulmonary immune response during Pseudomonas aeruginosa pneumonia.  
344 *American Journal of Physiology-Lung Cellular and Molecular Physiology* 2002; **282**(2): L285-  
345 L90.
- 346 8. Fritzsche B, Zhou-Suckow Z, Trojanek JB, et al. Hypoxic Epithelial Necrosis Triggers  
347 Neutrophilic Inflammation via IL-1 Receptor Signaling in Cystic Fibrosis Lung Disease.  
348 *American journal of respiratory and critical care medicine* 2015; **191**(8): 902-13.
- 349 9. Konstan MW, Byard PJ, Hoppel CL, Davis PB. Effect of high-dose ibuprofen in patients  
350 with cystic fibrosis. *New England Journal of Medicine* 1995; **332**(13): 848-54.
- 351 10. LaRock CN, Cookson BT. Burning down the house: cellular actions during pyroptosis.  
352 *PLoS pathogens* 2013; **9**(12): e1003793.
- 353 11. Abdul-Sater AA, Tattoli I, Jin L, et al. Cyclic-di-GMP and cyclic-di-AMP activate the  
354 NLRP3 inflammasome. *EMBO reports* 2013; **14**(10): 900-6.
- 355 12. Lindestam Arlehamn CS, Evans TJ. Pseudomonas aeruginosa pilin activates the  
356 inflammasome. *Cellular microbiology* 2011; **13**(3): 388-401.

- 357 13. Basso P, Ragno M, Elsen S, et al. Pseudomonas aeruginosa pore-forming exolysin and  
358 Type IV Pili Cooperate to induce host cell lysis. *MBio* 2017; **8**(1): e02250-16.
- 359 14. Franchi L, Stoolman J, Kanneganti TD, Verma A, Ramphal R, Núñez G. Critical role for  
360 Ipaf in *Pseudomonas aeruginosa*-induced caspase-1 activation. *European journal of immunology*  
361 2007; **37**(11): 3030-9.
- 362 15. Lin AE, Beasley FC, Keller N, et al. A Group A Streptococcus ADP-Ribosyltransferase  
363 Toxin Stimulates a Protective Interleukin 1 $\beta$ -Dependent Macrophage Immune Response. *mBio*  
364 2015; **6**(2): e00133-15.
- 365 16. Miao EA, Ernst RK, Dors M, Mao DP, Aderem A. *Pseudomonas aeruginosa* activates  
366 caspase 1 through Ipaf. *Proceedings of the National Academy of Sciences* 2008; **105**(7): 2562-7.
- 367 17. Miao EA, Mao DP, Yudkovsky N, et al. Innate immune detection of the type III secretion  
368 apparatus through the NLRC4 inflammasome. *Proceedings of the National Academy of Sciences*  
369 *of the United States of America* 2010; **107**(7): 3076-80.
- 370 18. Sutterwala FS, Mijares LA, Li L, Ogura Y, Kazmierczak BI, Flavell RA. Immune  
371 recognition of *Pseudomonas aeruginosa* mediated by the IPAF/NLRC4 inflammasome. *The*  
372 *Journal of Experimental Medicine* 2007; **204**(13): 3235-45.
- 373 19. Kung VL, Khare S, Stehlik C, Bacon EM, Hughes AJ, Hauser AR. An *rhs* gene of  
374 *Pseudomonas aeruginosa* encodes a virulence protein that activates the inflammasome.  
375 *Proceedings of the National Academy of Sciences* 2012; **109**(4): 1275-80.
- 376 20. LaRock CN, Cookson BT. The Yersinia Virulence Effector YopM Binds Caspase-1 to  
377 Arrest Inflammasome Assembly and Processing. *Cell Host & Microbe* 2012; **12**(6): 799-805.
- 378 21. Karmakar M, Sun Y, Hise AG, Rietsch A, Pearlman E. Cutting edge: IL-1 $\beta$  processing  
379 during *Pseudomonas aeruginosa* infection is mediated by neutrophil serine proteases and is  
380 independent of NLRC4 and caspase-1. *The Journal of Immunology* 2012; **189**(9): 4231-5.
- 381 22. Anantharajah A, Buyck JM, Faure E, et al. Correlation between cytotoxicity induced by  
382 *Pseudomonas aeruginosa* clinical isolates from acute infections and IL-1 $\beta$  secretion in a model of  
383 human THP-1 monocytes. *Pathogens and disease* 2015; **73**(7): ftv049.
- 384 23. Al Moussawi K, Kazmierczak BI. Distinct Contributions of Interleukin-1 $\alpha$  (IL-1 $\alpha$ ) and  
385 IL-1 $\beta$  to Innate Immune Recognition of *Pseudomonas aeruginosa* in the Lung. *Infection and*  
386 *Immunity* 2014; **82**(10): 4204-11.
- 387 24. Ganesan S, Rathinam VAK, Bossaller L, et al. Caspase-8 modulates dectin-1 and  
388 complement receptor 3-driven IL-1 $\beta$  production in response to beta-glucans and the fungal  
389 pathogen, *Candida albicans*. *J Immunol* 2014; **193**(5): 2519-30.
- 390 25. Maelfait J, Vercammen E, Janssens S, et al. Stimulation of Toll-like receptor 3 and 4  
391 induces interleukin-1 $\beta$  maturation by caspase-8. *J Exp Med* 2008; **205**(9): 1967-73.

- 392 26. Van Opdenbosch N, Van Gorp H, Verdonck M, et al. Caspase-1 Engagement and TLR-  
393 Induced c-FLIP Expression Suppress ASC/Caspase-8-Dependent Apoptosis by Inflammasome  
394 Sensors NLRP1b and NLRC4. *Cell reports* 2017; **21**(12): 3427-44.
- 395 27. Hsu L-C,ENZLER T, Seita J, et al. IL-1 [beta]-driven neutrophilia preserves antibacterial  
396 defense in the absence of the kinase IKK [beta]. *Nature immunology* 2011; **12**(2): 144-50.
- 397 28. Clancy DM, Sullivan GP, Moran HBT, et al. Extracellular Neutrophil Proteases Are  
398 Efficient Regulators of IL-1, IL-33, and IL-36 Cytokine Activity but Poor Effectors of Microbial  
399 Killing. *Cell Reports* 2018; **22**(11): 2937-50.
- 400 29. Conese M, Copreni E, Di Gioia S, De Rinaldis P, Fumarulo R. Neutrophil recruitment  
401 and airway epithelial cell involvement in chronic cystic fibrosis lung disease. *Journal of Cystic*  
402 *fibrosis* 2003; **2**(3): 129-35.
- 403 30. LaRock CN, Todd J, LaRock D, et al. IL-1 $\beta$  is an innate immune sensor of microbial  
404 proteolysis. *Science Immunology* 2016; **1**(2).
- 405 31. Howard AD, Kostura MJ, Thornberry N, et al. IL-1-converting enzyme requires aspartic  
406 acid residues for processing of the IL-1 beta precursor at two distinct sites and does not cleave  
407 31-kDa IL-1 alpha. *The Journal of Immunology* 1991; **147**(9): 2964.
- 408 32. Lapek JD, Jr., Jiang Z, Wozniak JM, et al. Quantitative Multiplex Substrate Profiling of  
409 Peptidases by Mass Spectrometry. *Mol Cell Proteomics* 2019; **18**(5): 968-81.
- 410 33. Xu JH, Jiang Z, Solania A, et al. A Commensal Dipeptidyl Aminopeptidase with  
411 Specificity for N-Terminal Glycine Degrades Human-Produced Antimicrobial Peptides in Vitro.  
412 *ACS Chem Biol* 2018; **13**(9): 2513-21.
- 413 34. Beaufort N, Corvazier E, Mlanaoindrou S, de Bentzmann S, Pidard D. Disruption of the  
414 endothelial barrier by proteases from the bacterial pathogen *Pseudomonas aeruginosa*:  
415 implication of matrilysin and receptor cleavage. *PLoS One* 2013; **8**(9): e75708.
- 416 35. Casilag F, Lorenz A, Krueger J, Klawonn F, Weiss S, Häussler S. The LasB elastase of  
417 *Pseudomonas aeruginosa* acts in concert with alkaline protease AprA to prevent flagellin-  
418 mediated immune recognition. *Infection and immunity* 2016; **84**(1): 162-71.
- 419 36. LaFayette SL, Houle D, Beaudoin T, et al. Cystic fibrosis-adapted *Pseudomonas*  
420 *aeruginosa* quorum sensing lasR mutants cause hyperinflammatory responses. *Science advances*  
421 2015; **1**(6): e1500199.
- 422 37. Matheson NR, Potempa J, Travis J. Interaction of a novel form of *Pseudomonas*  
423 *aeruginosa* alkaline protease (aeruginolysin) with interleukin-6 and interleukin-8. *Biological*  
424 *chemistry* 2006; **387**(7): 911-5.
- 425 38. Parmely M, Gale A, Clabaugh M, Horvat R, Zhou WW. Proteolytic inactivation of  
426 cytokines by *Pseudomonas aeruginosa*. *Infection and Immunity* 1990; **58**(9): 3009-14.

- 427 39. Saint-Criq V, Villeret B, Bastaert F, et al. Pseudomonas aeruginosa LasB protease  
428 impairs innate immunity in mice and humans by targeting a lung epithelial cystic fibrosis  
429 transmembrane regulator–IL-6–antimicrobial–repair pathway. *Thorax* 2017; thoraxjnl-2017-  
430 210298.
- 431 40. Afonina IS, Müller C, Martin SJ, Beyaert R. Proteolytic processing of interleukin-1  
432 family cytokines: variations on a common theme. *Immunity* 2015; **42**(6): 991-1004.
- 433 41. Jaffar-Bandjee MC, Lazdunski A, Bally M, Carrère J, Chazalotte JP, Galabert C.  
434 Production of elastase, exotoxin A, and alkaline protease in sputa during pulmonary exacerbation  
435 of cystic fibrosis in patients chronically infected by Pseudomonas aeruginosa. *Journal of Clinical*  
436 *Microbiology* 1995; **33**(4): 924-9.
- 437 42. Cabral VP, Andrade CAFd, Passos SRL, Martins MdFM, Hökerberg YHM. Severe  
438 infection in patients with rheumatoid arthritis taking anakinra, rituximab, or abatacept: A  
439 systematic review of observational studies. *Revista brasileira de reumatologia* 2016; **56**(6): 543-  
440 50.
- 441 43. Cantin AM, Woods DE. Aerosolized prolactin suppresses bacterial proliferation in a  
442 model of chronic Pseudomonas aeruginosa lung infection. *American journal of respiratory and*  
443 *critical care medicine* 1999; **160**(4): 1130-5.
- 444 44. Martin SL, Downey D, Bilton D, Keogan MT, Edgar J, Elborn JS. Safety and Efficacy of  
445 Recombinant Alpha1-Antitrypsin Therapy in Cystic Fibrosis. *Pediatric pulmonology* 2006;  
446 **41**(2): 177-83.
- 447 45. O'Connor CM, Gaffney K, Keane J, et al. ~1-Proteinase Inhibitor, Elastase Activity, and  
448 Lung Disease Severity in Cystic Fibrosis. *American Review of Respiratory Disease* 1993; **148**:  
449 1665-.
- 450 46. Gaggar A, Hector A, Bratcher PE, Mall MA, Griese M, Hartl D. The role of matrix  
451 metalloproteinases in cystic fibrosis lung disease. *European Respiratory Journal* 2011; **38**(3):  
452 721-7.
- 453 47. Choi KH, Schweizer HP. mini-Tn7 insertion in bacteria with single attTn7 sites: example  
454 Pseudomonas aeruginosa. *Nature Protocols* 2006; **1**(1): 153.
- 455 48. Klock HE, Lesley SA. The Polymerase Incomplete Primer Extension (PIPE) method  
456 applied to high-throughput cloning and site-directed mutagenesis. *High Throughput Protein*  
457 *Expression and Purification: Methods and Protocols* 2009: 91-103.
- 458 49. LaRock CN, Döhrmann S, Todd J, et al. Group A Streptococcal M1 Protein Sequesters  
459 Cathelicidin to Evade Innate Immune Killing. *Cell host & microbe* 2015; **18**(4): 1-7.
- 460 50. LaRock DL, Sands JS, Ettouati E, et al. Inflammasome inhibition blocks cardiac  
461 glycoside cell toxicity. *Journal of Biological Chemistry* 2019; **294**(34): 12846-54.

- 462 51. O'Donoghue AJ, Knudsen GM, Beekman C, et al. Destructin-1 is a collagen-degrading  
463 endopeptidase secreted by *Pseudogymnoascus destructans*, the causative agent of white-nose  
464 syndrome. *Proceedings of the National Academy of Sciences* 2015; **112**(24): 7478-83.
- 465 52. Jacobs MA, Alwood A, Thaipisuttikul I, et al. Comprehensive transposon mutant library  
466 of *Pseudomonas aeruginosa*. *Proceedings of the National Academy of Sciences* 2003; **100**(24):  
467 14339-44.  
468  
469



470 **FIGURE LEGENDS**

471 **Figure 1. IL-1 $\beta$  drives neutrophilic inflammation during *P. aeruginosa* lung infection**

472 C57BL/6 mice intratracheally infected with  $10^7$  colony forming units (CFU) of PAO1 and treated  
473 with anakinra (50  $\mu$ g/kg) or PBS control, compared to uninfected mice. Mice were euthanized  
474 after 24 h and (A) lung histology sections or cytological smears of bronchoalveolar lavage fluid  
475 (BAL) prepared with differential MGG stain, (B) BAL cytokines measured by enzyme-linked  
476 immunosorbent assay, (C-D) bacterial CFU in BAL or lung homogenate, and (E) BAL neutrophils  
477 enumerated. (F) C57BL/6 or isogenic caspase-1/11<sup>-/-</sup> mice intratracheally infected with  $10^7$  CFU  
478 PAO1 24 h, euthanized, and BAL cytokines measured by enzyme-linked immunosorbent assay.  
479 Where applicable, data are mean  $\pm$  SEM and represent at least 3 independent experiments.  
480 Significance determined by Mann-Whitney U-test (\* $P < 0.05$ , \*\* $P < 0.005$ ).

481

482 **Figure 2. *P. aeruginosa* induces IL-1 $\beta$  maturation independent of the inflammasome**

483 (A) Diagram of IL-1 reporter assay. Pro-IL-1 $\beta$  does not induce signaling through the IL-1R.  
484 Removal of the pro-domain, intracellularly or extracellularly, by any protease that can do so,  
485 results in an active cytokine with proinflammatory activity. (B) Relative IL-1 signaling by  
486 caspase-1/11<sup>-/-</sup> (grey) or control C57Bl/6 BMMs (black) after 2 h co-incubation of the indicated  
487 *Pseudomonas* strains. Nigericin (5  $\mu$ M) is included as a positive control for inflammasome-  
488 dependent IL-1 $\beta$  maturation. (C) Mature IL-1 and enzyme-linked immunosorbent assay  
489 measurement of IL-1 $\alpha$  and IL-1 $\beta$  present in any form, released from PAO1-infected caspase-1/11<sup>-/-</sup>  
490 BMM with monoclonal antibodies neutralizing IL-1R1, IL-1 $\alpha$ , IL-1 $\beta$ , or an isotype control. (D)  
491 Relative IL-1 signaling by human THP-1 macrophages, HL60 neutrophils, or A549 epithelial cells  
492 treated with caspase-1 inhibitor (YVAD) or control (Mock) 1 h prior to infection. Infections were



493 at MOI=10 and after 2 h the supernatant collected and mature IL-1 quantified using IL-1R1  
494 reporter cells. Where applicable, data are mean  $\pm$  SEM and represent at least 3 independent  
495 experiments; significance determined by unpaired two-tailed Student's T-test, \* $P < 0.05$ .

496

497 **Figure 3. IL-1 $\beta$  is activated by the *P. aeruginosa* LasB protease**

498 (A) Relative IL-1 signaling by caspase-1/11<sup>-/-</sup> BMM 2 h post-infection by PAO1 that were  
499 previously incubated 1 h with the indicated protease inhibitors classes. (B) Visualization of  
500 bacterial proteolytic activity by decreased media opacity on LB agarose plates containing casein.  
501 (C) Relative IL-1 signaling by caspase-1/11<sup>-/-</sup> BMM 2 h post-infection with isogenic mutant strains  
502 of PAO1. (D) Relative IL-1 signaling by caspase-1/11<sup>-/-</sup> BMM 2 h post-infection by PAO1,  $\Delta lasB$ ,  
503 or plasmid-complemented  $\Delta lasB$  and (E) *illb* expression by real-time quantitative PCR. Where  
504 applicable, data are mean  $\pm$  SEM and represent at least 3 independent experiments; significance  
505 determined by unpaired two-tailed Student's T-test, \* $P < 0.05$ .

506

507 **Figure 4. LasB-activated IL-1 $\beta$  is active**

508 (A) IL-1 signaling activity by human pro-IL-1 $\beta$  after 2 h incubation with titrations of recombinant  
509 LasB. (B) SDS-PAGE analysis of recombinant human pro-IL-1 $\beta$  maturation by recombinant LasB.  
510 (C) Signaling activity of recombinant IL-1 $\beta$  N-terminal truncations generated using *in vitro*  
511 transcription/translation from each codon, 1 is full-length pro-IL-1 $\beta$ , 117 corresponds to the  
512 fragment generated by caspase-1 cleavage. (D) Cleavage of internally-quenched fluorescent IL-1 $\beta$   
513 peptide fragments (amino acids 103-123 of human IL-1 $\beta$ ) by recombinant LasB or caspase-1. (E)  
514 IceLogo frequency plot showing amino acids significantly enriched (above X-axis) and de-  
515 enriched (below X-axis) in the P2 to P2' positions following incubation of LasB with a mixture of  
516 228 tetradecapeptides. Cleavage occurs between P1 and P1', lowercase "n" is norleucine. (F)

517 Cleavage of internally-quenched fluorescent IL-1 $\beta$  peptide fragments by proteases within BAL  
518 collected from C57BL/6 or casp-1/11<sup>-/-</sup> mice 24 h post-intratracheal infection with 10<sup>7</sup> CFU of  
519 PAO1 or  $\Delta$ lasB. Where applicable, data are mean  $\pm$  SEM and represent at least 3 independent  
520 experiments; significance determined by unpaired two-tailed Student's T-test, \* $P$  < 0.05.

521

522 **Figure 5. Metalloprotease inhibitors prevent pathological inflammation during *P. aeruginosa***  
523 **infection**

524 (A) Cleavage of internally quenched IL-1 $\beta$  fragment HDAPVRSLN by recombinant LasB  
525 incubated with titrations of Marimastat and Ilomastat. (B) IL-1 signaling by THP-1 macrophages  
526 2 h post-infection with PAO1, MOI=10, incubated with titrations of Marimastat and Ilomastat.  
527 C57BL/6 mice intratracheally infected with 10<sup>7</sup> CFU PAO1 and treated with 25  $\mu$ g/kg Ilomastat,  
528 25  $\mu$ g/kg Marimastat, or PBS control. After 24 h, mouse BAL was harvested and (C) IL-1 $\beta$   
529 measured by enzyme-linked immunosorbent assay and (D) neutrophils enumerated. (E)  
530 Representative histology sections cytological smears of bronchoalveolar lavage fluid prepared  
531 with differential MGG stain. Where applicable, data are mean  $\pm$  SEM and represent at least 3  
532 independent experiments. Significance determined by Mann-Whitney U-test (\* $P$  < 0.05, \*\* $P$  <  
533 0.005).

534

535

536 **Tables and Figures**

537 **TABLE 1 Bacterial strains, plasmids, and primers used in this study**

| Strain, plasmid, or primer          | Relevant feature(s) or sequence                              | Reference or Source |
|-------------------------------------|--------------------------------------------------------------|---------------------|
| <b>Strains</b>                      |                                                              |                     |
| <i>P. aeruginosa</i>                |                                                              |                     |
| PAO1                                | WT reference strain                                          | 52                  |
| PAO1 <i>lasB</i> ::Tn               | <i>lasB</i> transposon insert                                | 52                  |
| PAO1 <i>fliC</i> ::Tn               | <i>fliC</i> transposon insert                                | 52                  |
| PAO1 <i>lasA</i> ::Tn               | <i>lasA</i> transposon insert                                | 52                  |
| PAO1 <i>piv</i> ::Tn                | <i>piv</i> transposon insert                                 | 52                  |
| PAO1 <i>lasB</i> ::Tn:: <i>lasB</i> | <i>lasB</i> ::Tn complemented with mTn7T< <i>lasB</i> >      | This study          |
| MDR-P4                              | WT strain                                                    | G. Sakoulas         |
| PA103                               | WT strain                                                    | ATCC                |
| 27312                               | WT strain                                                    | ATCC                |
| 27864                               | WT strain                                                    | ATCC                |
| 10145                               | WT strain                                                    | ATCC                |
| GNR697                              | WT strain                                                    | G. Sakoulas         |
| Hanity                              | WT strain                                                    | G. Sakoulas         |
| <b>Plasmid</b>                      |                                                              |                     |
| pET-proIL-1β                        | Vector for expression of recombinant human pro-IL-1β         | 30                  |
| pET-LasB                            | Vector for expression of recombinant LasB                    | This study          |
| pUC18T-mTn7T                        | Complementation vector                                       | 47                  |
| pUC18T< <i>lasB</i> >               | <i>lasB</i> insertion in mini-Tn7T for complementation       | This study          |
| <b>Oligonucleotides</b>             |                                                              |                     |
| <i>lasB</i> -F                      | CAATTCGATCATGCATGAGCTAGCTGCCACCTGCTTTTCT                     |                     |
| <i>lasB</i> -R                      | CCAAGCTTCTCGAGGAATTCCTTACAACGCGCTCGGG                        |                     |
| pET-LasB-A                          | TCTGTTCAGGGGCCCCATGAAGAAGGTTTCTACGCTTGAC                     |                     |
| pET-LasB-B                          | TGCTCGAGTGGGCGCTTACAACGCGCTCGGG                              |                     |
| pET-LasB-C                          | GTCAAGCGTAGAAACCTTCTTACATGGGCCCCGTGGAACAGA                   |                     |
| pET-LasB-D                          | CCCGAGCGCGTTGTAAGGCCGCACTCGAGCA                              |                     |
| LasB CT His-1                       | TTGCATCATCATCATCACTAAGGCCGCACTCGAGC                          |                     |
| LasB CT His-2                       | TTAGTGATGATGATGATGATGCAACGCGCTCGGG                           |                     |
| Tn7-F                               | AGAAAAGCAGGTGGCAGCTAGCTCATGCATGATCGAATT                      |                     |
| Tn7-R                               | CCCGAGCGCGTTGTAAGGAATTCCTCGAGAAGCTTGG                        |                     |
| <i>il1b</i> -F                      | TGGACCTTCCAGGATGAGGACA                                       |                     |
| <i>il1b</i> -R                      | GTTTCATCTCGGAGCCTGTAGTG                                      |                     |
| <i>gapdh</i> -F                     | TGTGGGCATCAATGGATTGG                                         |                     |
| <i>gapdh</i> -R                     | ACACCATGTATTCCGGGTCAAT                                       |                     |
| IVTTIL1b-term                       | TTTTTTTTTTTTTTTTTTTTAGGAAGACACAAATTGCATGG                    |                     |
| IVTTIL1b-1                          | GAAATTAATACGACTCACTATAGGGAGACCCCACCATGGCAGAAGTACCTGAGCTCGC   |                     |
| IVTTIL1b-12                         | GAAATTAATACGACTCACTATAGGGAGACCCCACCATGATGGCTTATTACAGTGGCAA   |                     |
| IVTTIL1b-24                         | GAAATTAATACGACTCACTATAGGGAGACCCCACCATGTTTGAAGCTGATGGCCCTAA   |                     |
| IVTTIL1b-36                         | GAAATTAATACGACTCACTATAGGGAGACCCCACCATGTTCCAGGACCTGGACCTCTG   |                     |
| IVTTIL1b-48                         | GAAATTAATACGACTCACTATAGGGAGACCCCACCATGATCCAGCTACGAATCTCCGA   |                     |
| IVTTIL1b-60                         | GAAATTAATACGACTCACTATAGGGAGACCCCACCATGGGCTTCAGGCAGGCCGCGTC   |                     |
| IVTTIL1b-72                         | GAAATTAATACGACTCACTATAGGGAGACCCCACCATGGACAAGCTGAGGAAGATGCT   |                     |
| IVTTIL1b-84                         | GAAATTAATACGACTCACTATAGGGAGACCCCACCATGACCTTCCAGGAGAATGACCT   |                     |
| IVTTIL1b-87                         | GAAATTAATACGACTCACTATAGGGAGACCCCACCATGGAGAATGACCTGAGCACCTT   |                     |
| IVTTIL1b-90                         | GAAATTAATACGACTCACTATAGGGAGACCCCACCATGCTGAGCACCTTCTTTCCCTT   |                     |
| IVTTIL1b-93                         | GAAATTAATACGACTCACTATAGGGAGACCCCACCATGTTCTTTCCCTTCACTTTGA    |                     |
| IVTTIL1b-96                         | GAAATTAATACGACTCACTATAGGGAGACCCCACCATGTTCACTTTTGAAGAAGAACC   |                     |
| IVTTIL1b-99                         | GAAATTAATACGACTCACTATAGGGAGACCCCACCATGGAAGAAGAACCCTATCTTCTT  |                     |
| IVTTIL1b-102                        | GAAATTAATACGACTCACTATAGGGAGACCCCACCATGCCTATCTTCTTCGACACATG   |                     |
| IVTTIL1b-105                        | GAAATTAATACGACTCACTATAGGGAGACCCCACCATGTTTCGACACATGAGGATAACGA |                     |
| IVTTIL1b-108                        | GAAATTAATACGACTCACTATAGGGAGACCCCACCATGTTGGATAACGAGGCTTATGT   |                     |
| IVTTIL1b-111                        | GAAATTAATACGACTCACTATAGGGAGACCCCACCATGGAGGCTTATGTGCACGATGC   |                     |
| IVTTIL1b-114                        | GAAATTAATACGACTCACTATAGGGAGACCCCACCATGGTACGATCACTGAACCTGCACG |                     |
| IVTTIL1b-117                        | GAAATTAATACGACTCACTATAGGGAGACCCCACCATGGCACCTGTACGACTCACTGAAC |                     |
| IVTTIL1b-120                        | GAAATTAATACGACTCACTATAGGGAGACCCCACCATGCGATCACTGAACCTGCACGCT  |                     |
| IVTTIL1b-122                        | GAAATTAATACGACTCACTATAGGGAGACCCCACCATGCTGAACCTGCACGCTCCGGGAC |                     |
| IVTTIL1b-123                        | GAAATTAATACGACTCACTATAGGGAGACCCCACCATGAACTGCACGCTCCGGGACTC   |                     |
| IVTTIL1b-126                        | GAAATTAATACGACTCACTATAGGGAGACCCCACCATGCTCCGGGACTCACAGCAAAA   |                     |

538

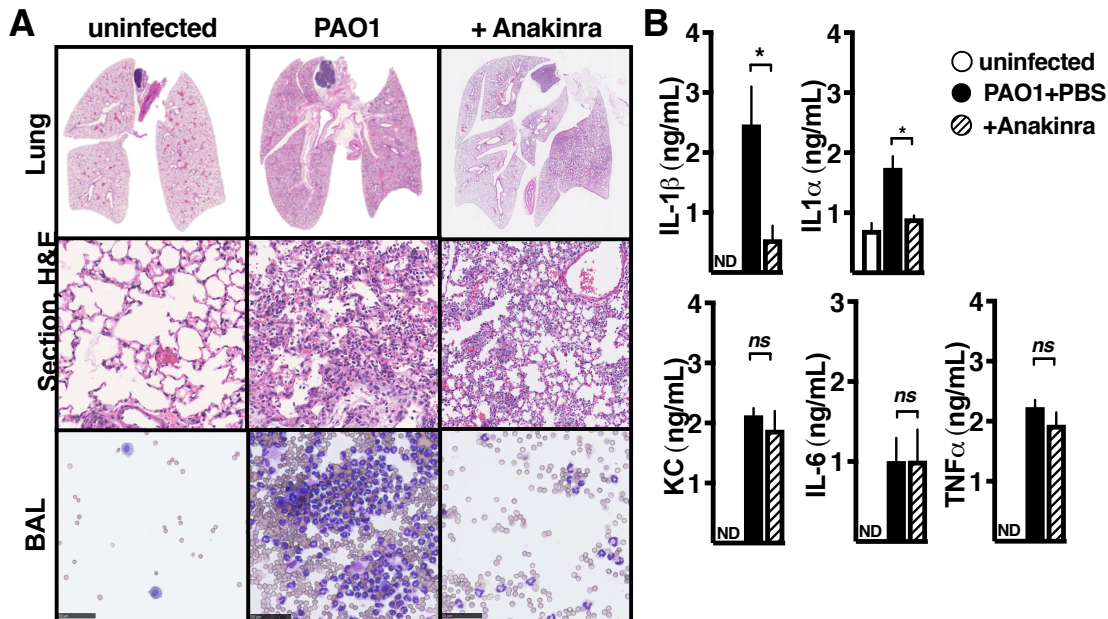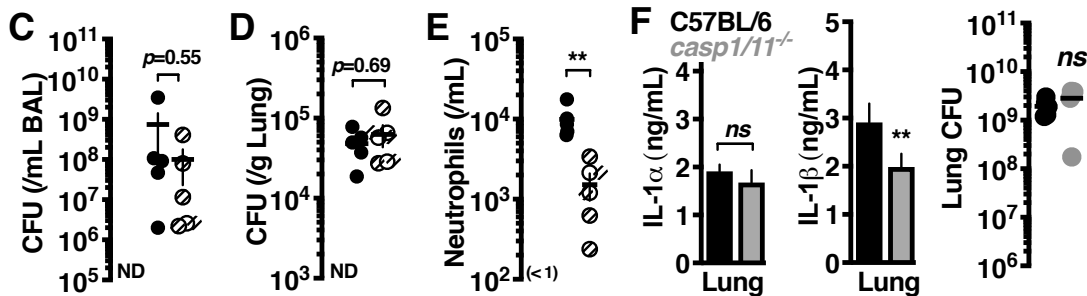

**A**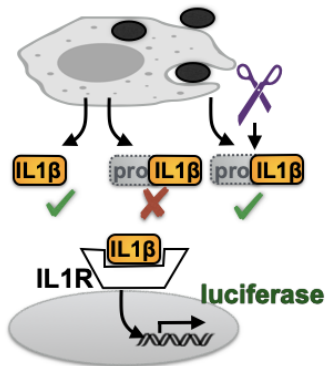**B**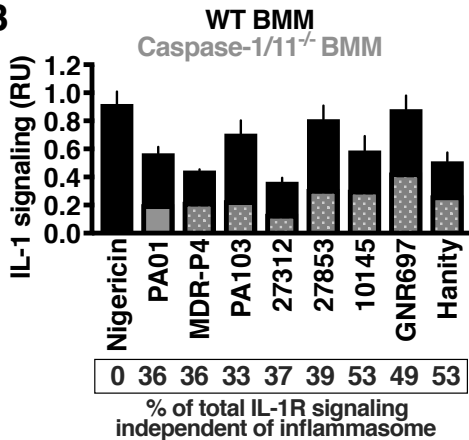**C**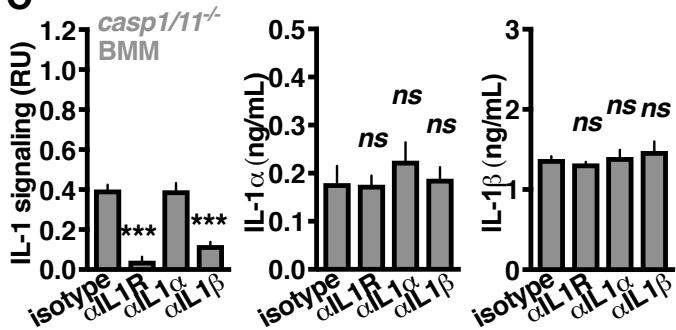**D**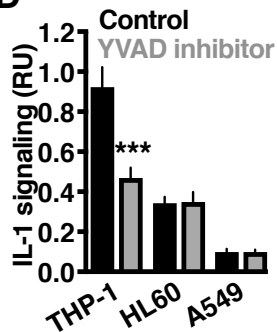

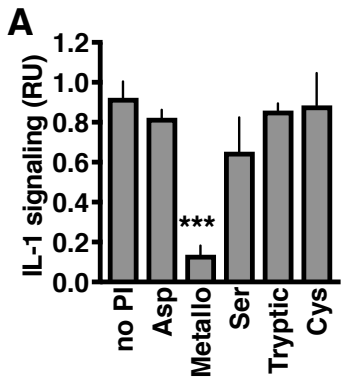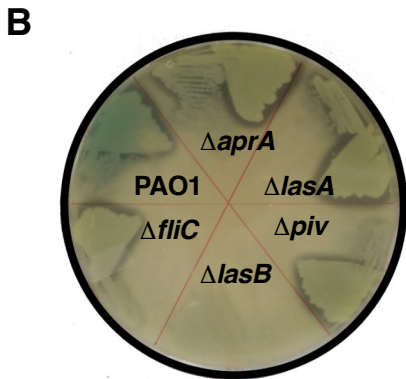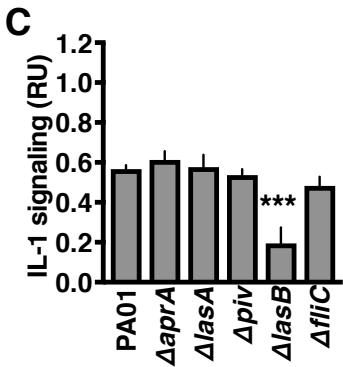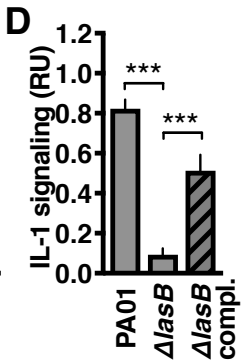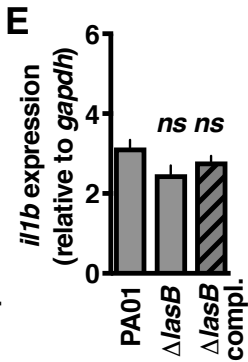

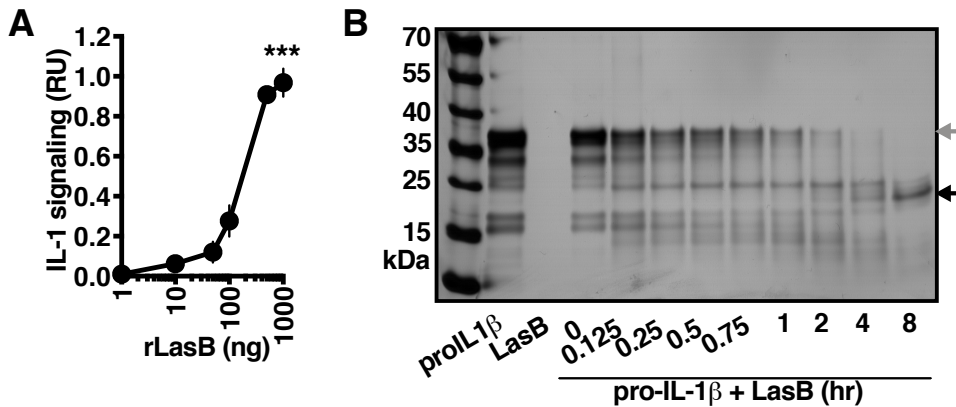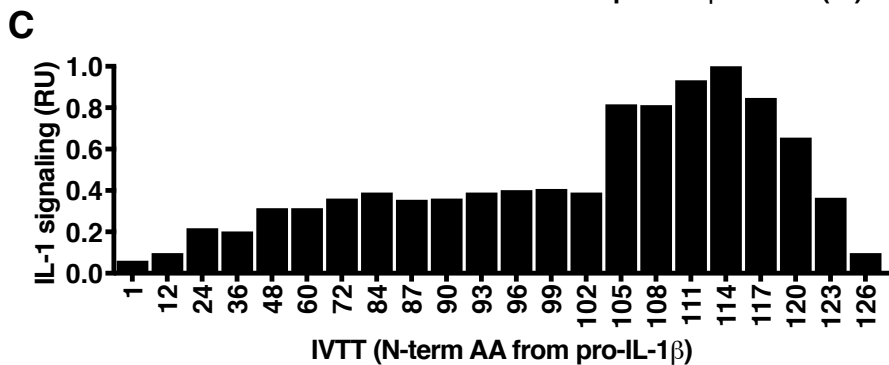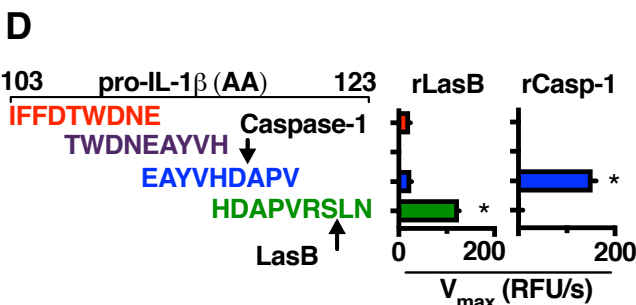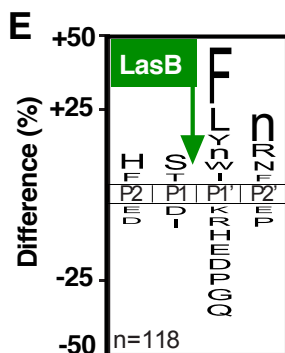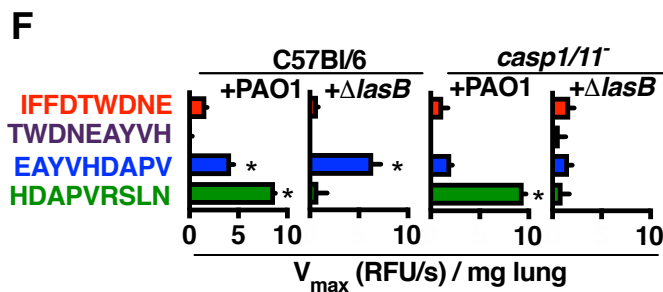

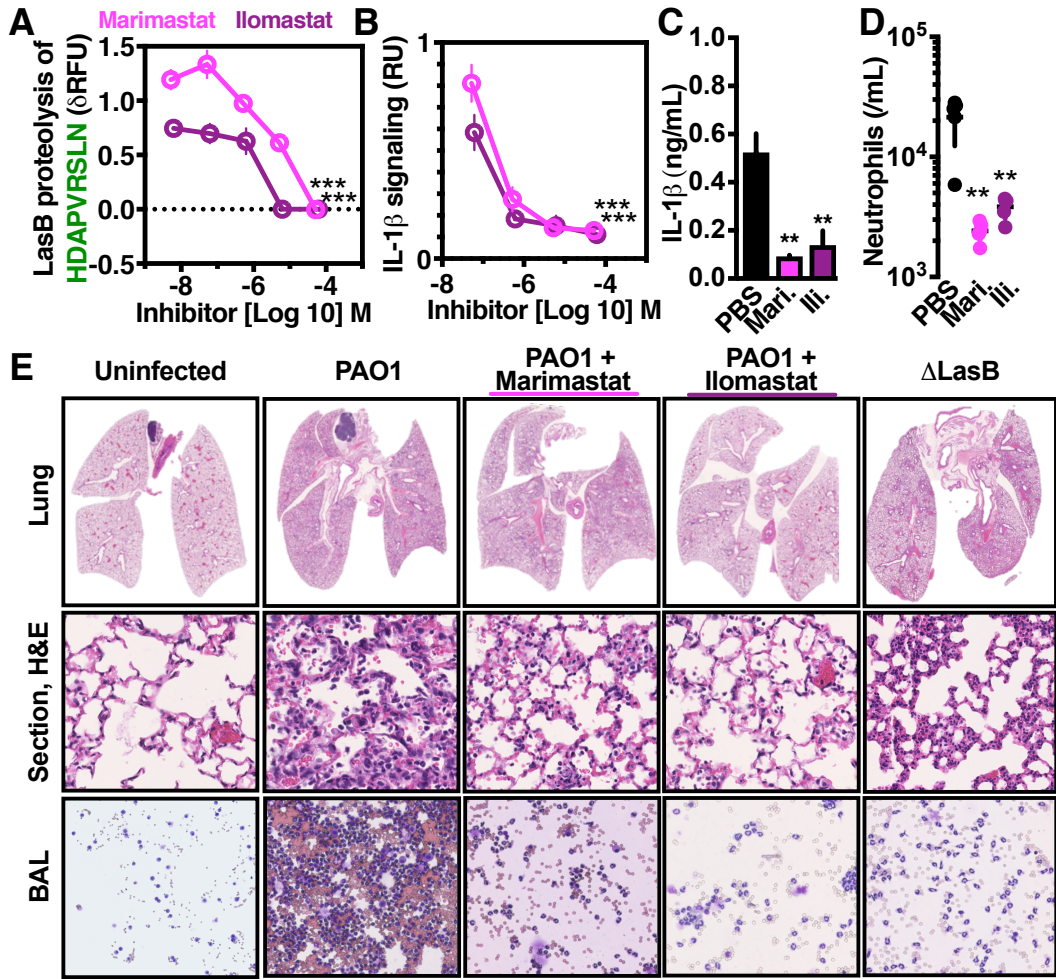

Source: https://www.biorxiv.org/content/10.1101/2020.05.18.101303v1.full.pdf
